# Supplementary material
Source: PubMed Central journal article supplement (PMC4977992)
Supplement: NIHMS772976-supplement-Supplemental_Digital_Content_1.pdf [file NIHMS772976-supplement-Supplemental_Digital_Content_1.pdf]

Supplemental Information for  
Quantitative Analysis of Polycyclic Aromatic Hydrocarbons and Polychlorinated Dibenzo-p-Dioxins/Dibenzofurans in Microliter Samples of Human Serum

Xiaoyan Xia,<sup>1</sup> Alesia Carroll-Haddad,<sup>1</sup> Nicole, Brown,<sup>2</sup> Mark J. Utell,<sup>3</sup> Timothy Mallon,<sup>4</sup> Philip K. Hopke<sup>1</sup>

1. Center for Air Resources Engineering and Science, Clarkson University, Potsdam, NY 13699
2. ALS Life Sciences Division | Environmental, Houston, TX 77099 USA
3. Departments of Medicine and Environmental Medicine, University of Rochester Medical Center, Rochester, NY 14642
4. Uniformed Services University of the Health Sciences, Bethesda, MD 20814

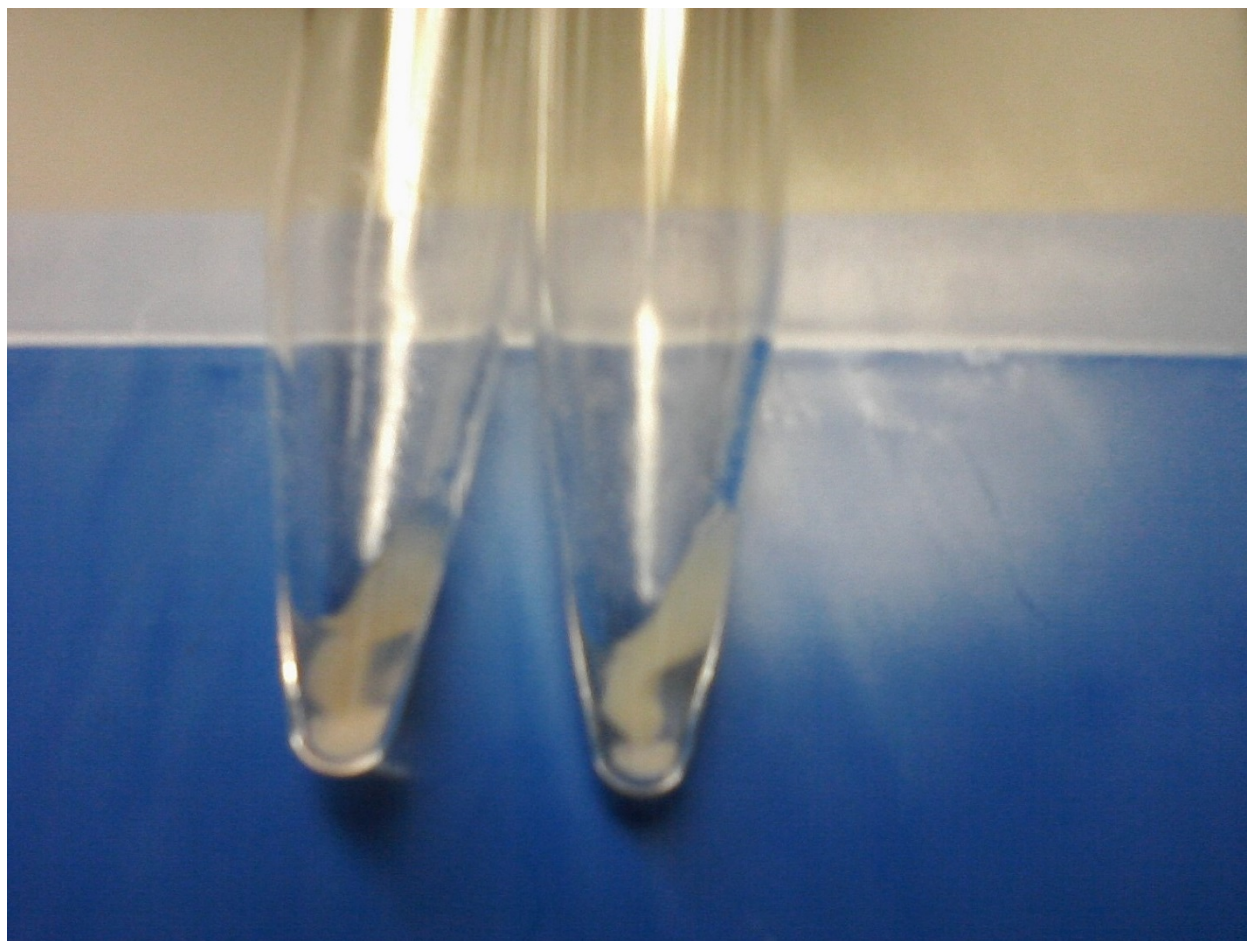

Figure S1. Picture showing centrifuge tubes after the systems have exceeded their cloud points.
